# Supplementary figures and images for: Carbon Exchange between the Atmosphere and a Subtropical Evergreen Mountain Forest in Taiwan
Source: Hindawi journal article supplement (doi:10.1155/2018/9287249), 2018-11-21

Supplementary Material


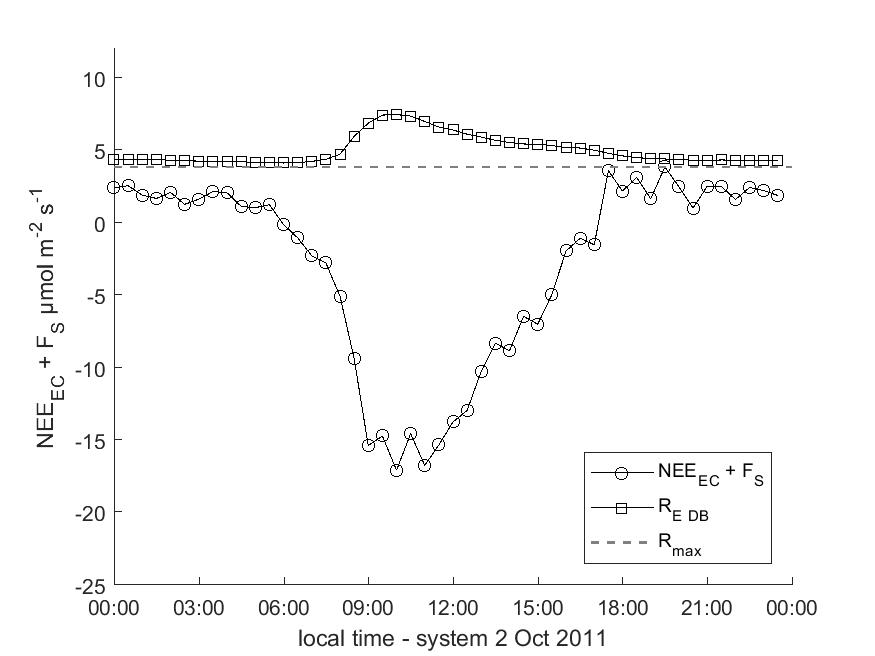

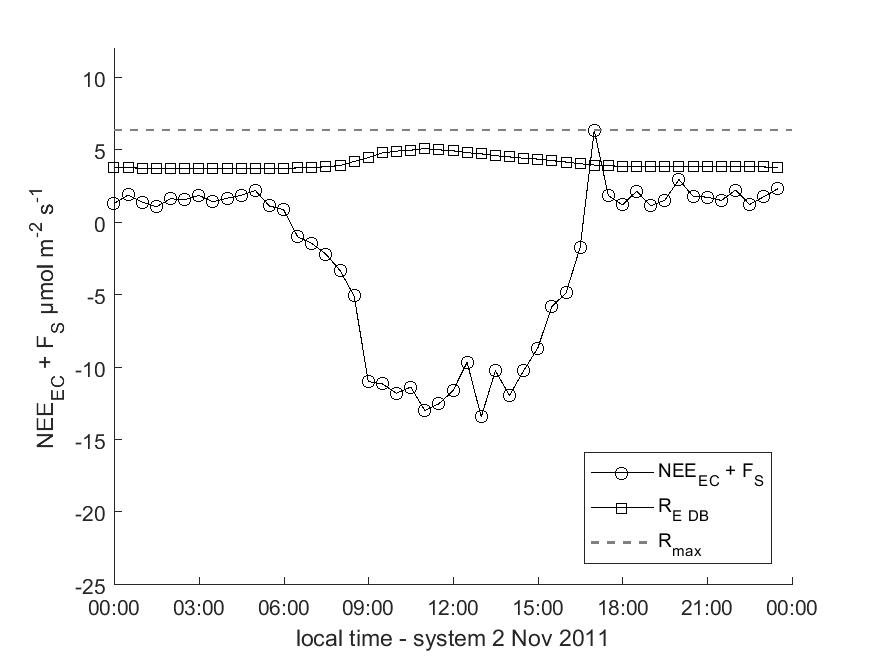

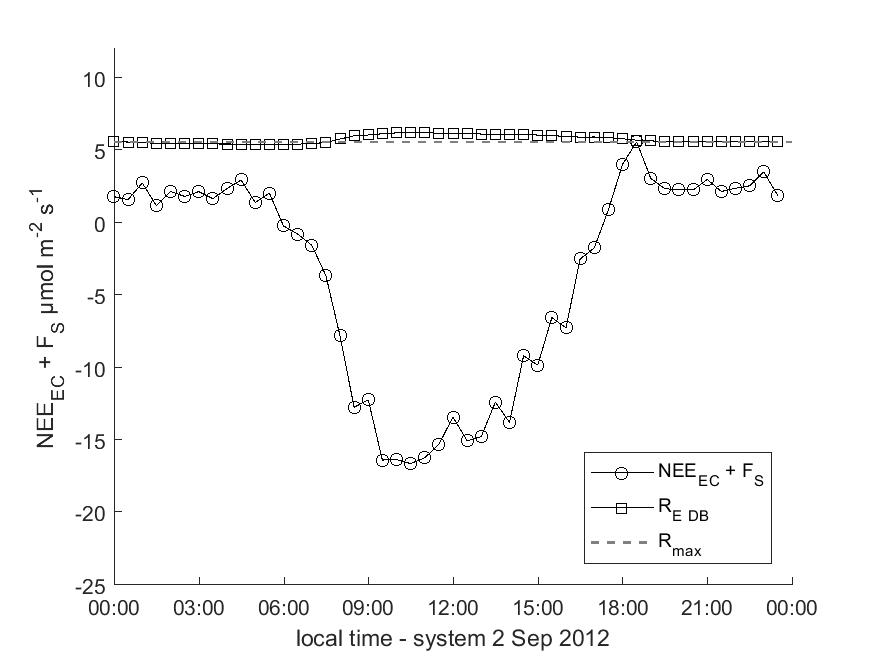

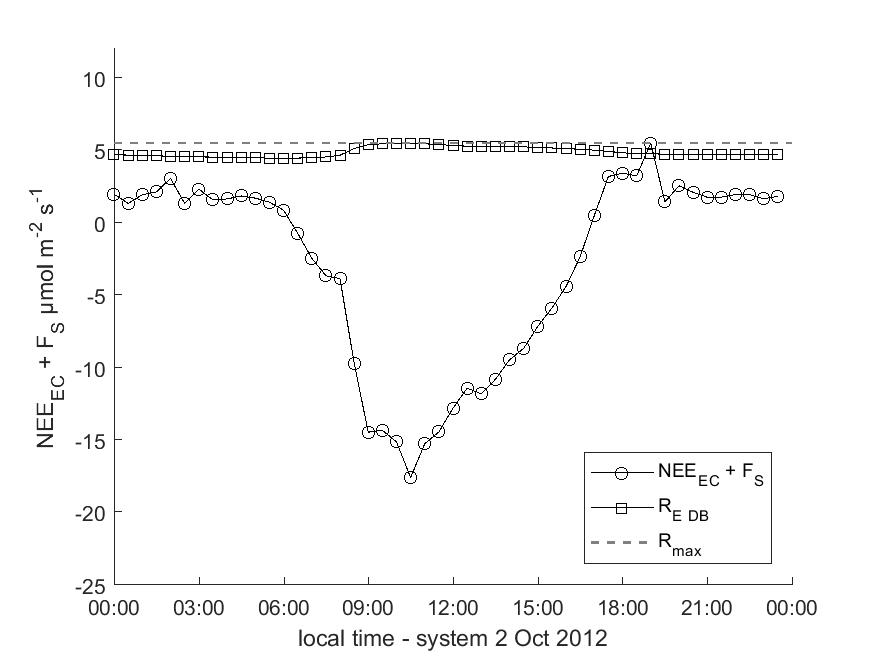

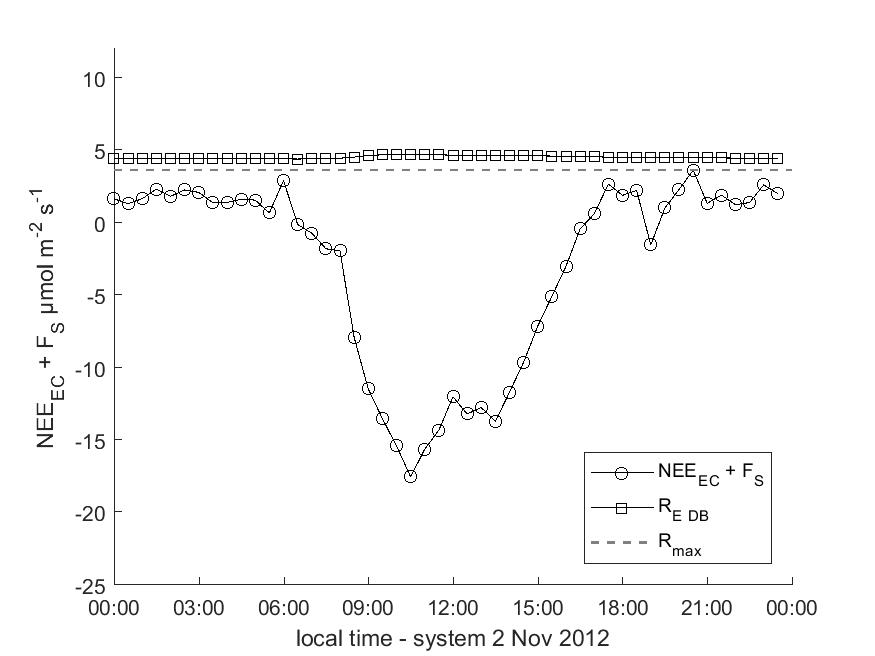

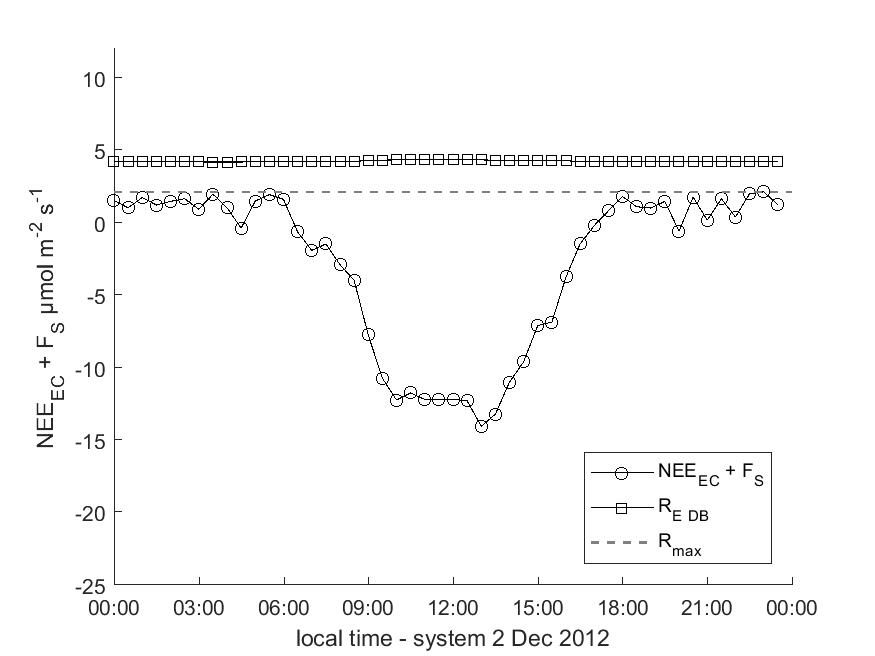

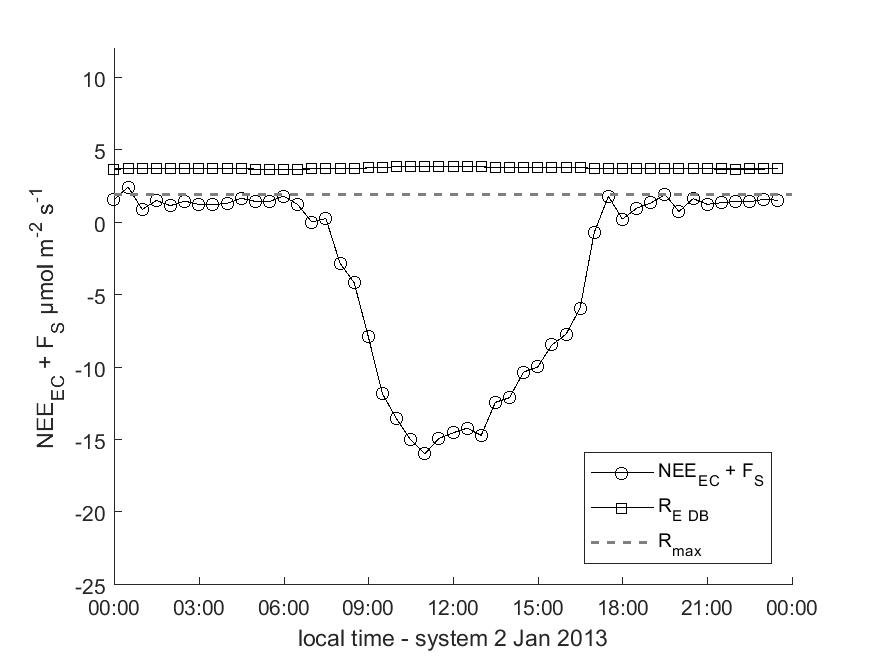

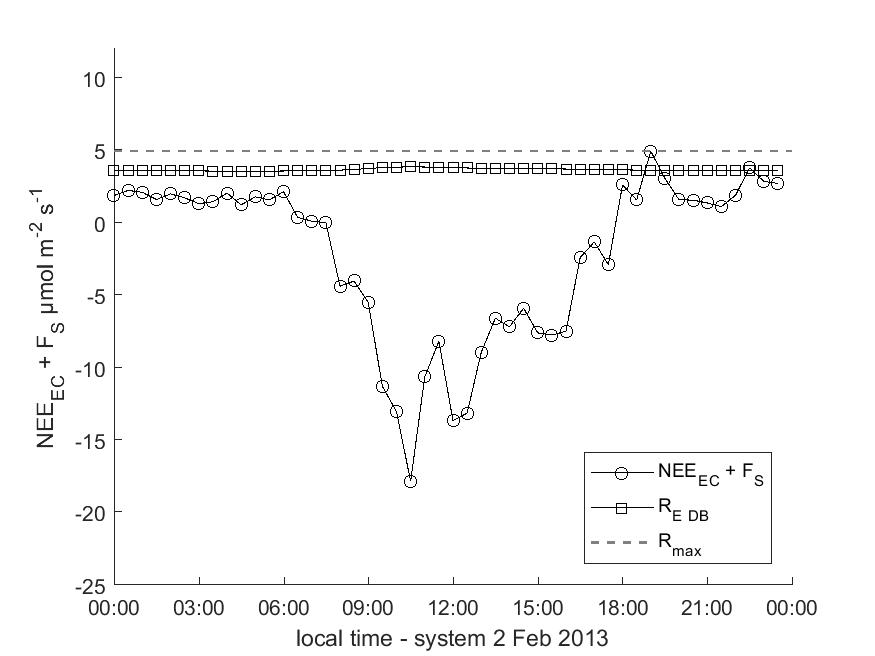

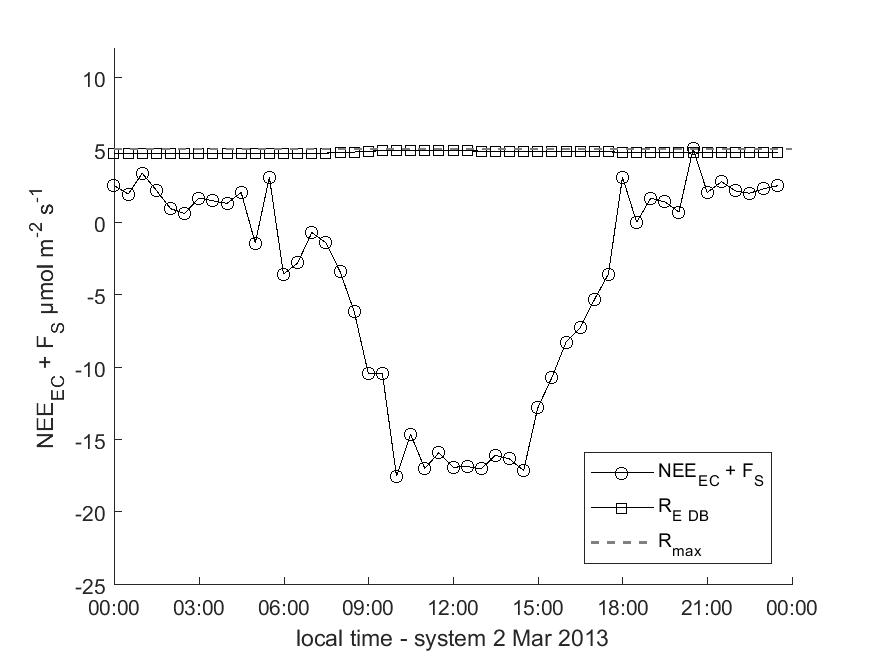

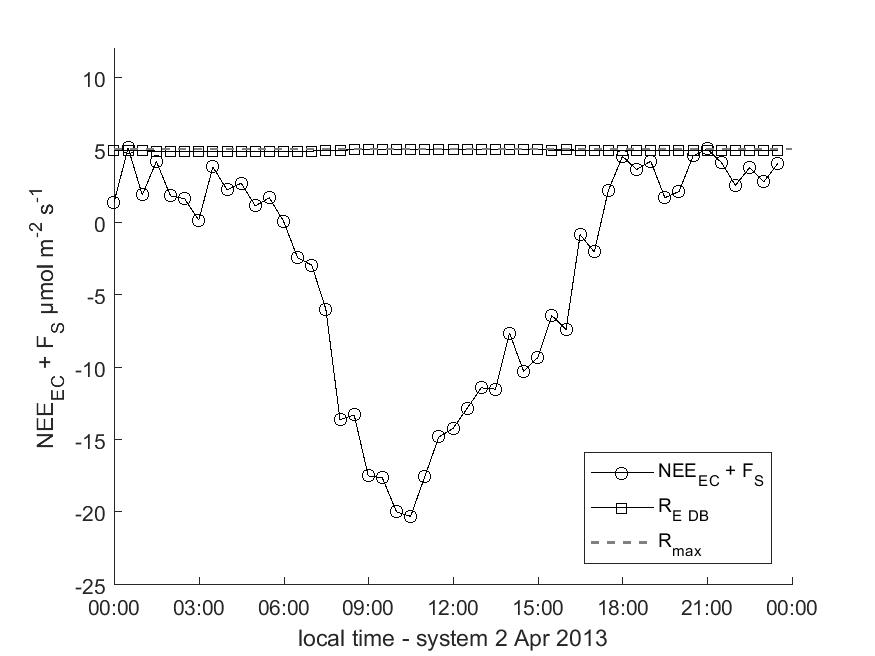

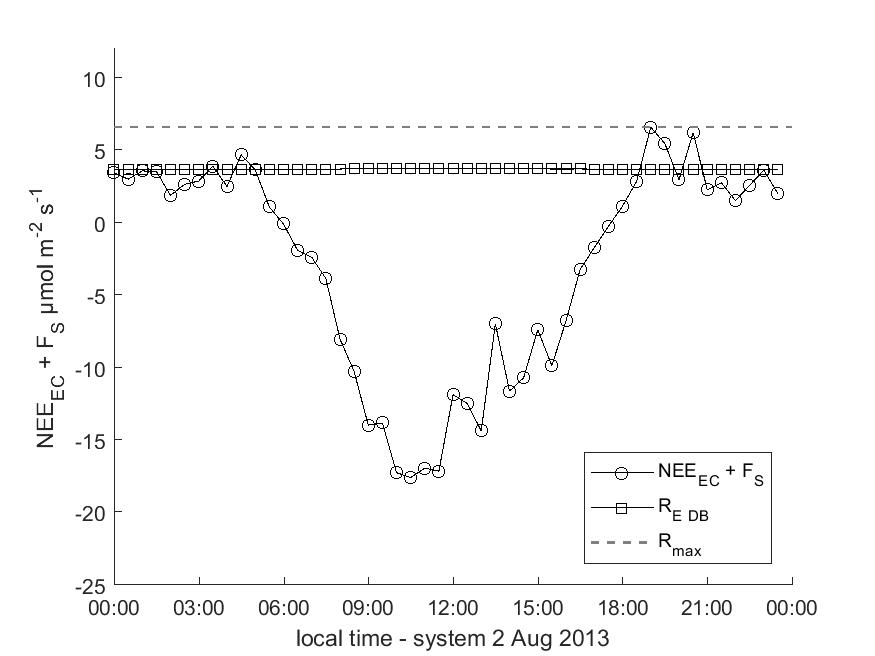

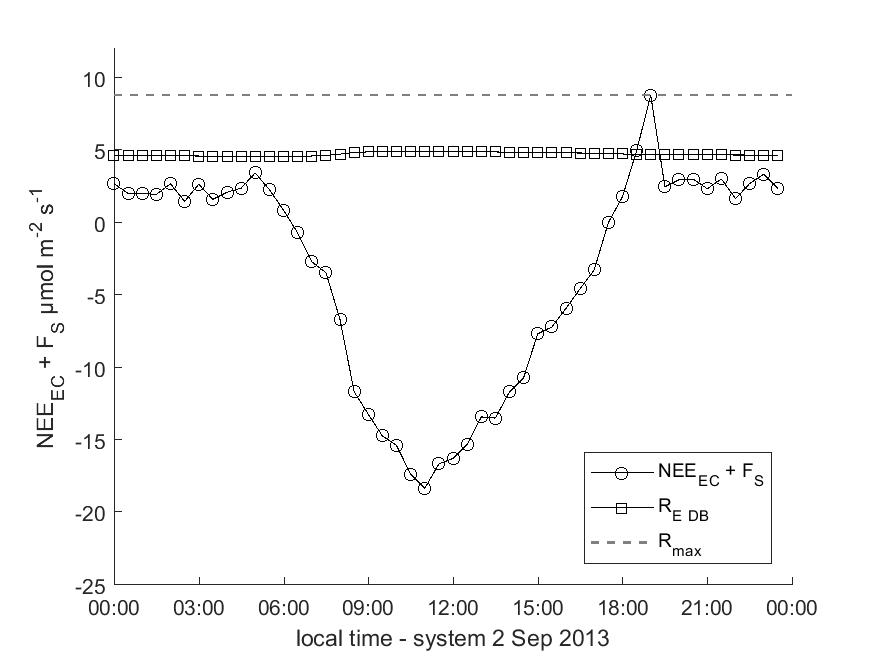

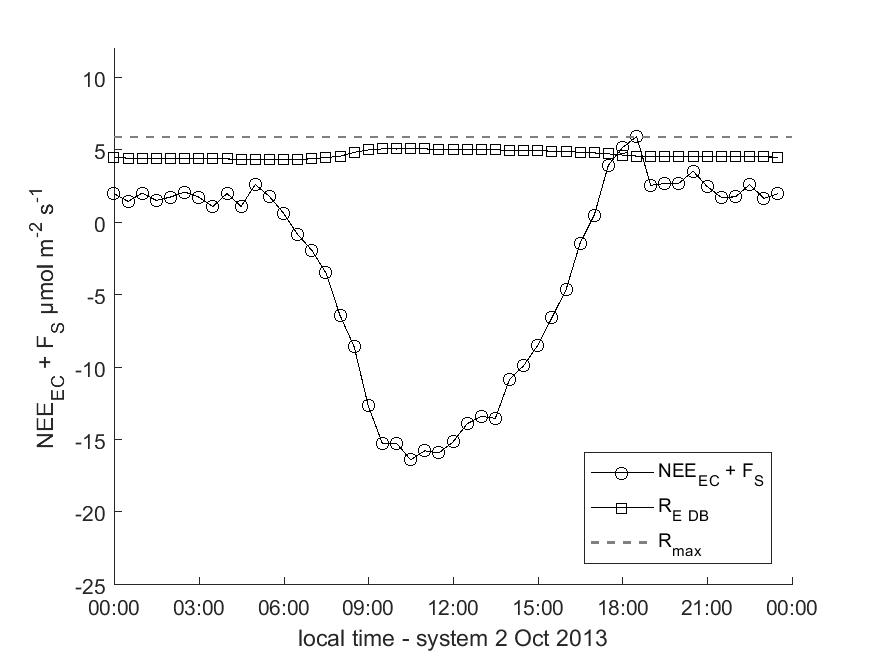

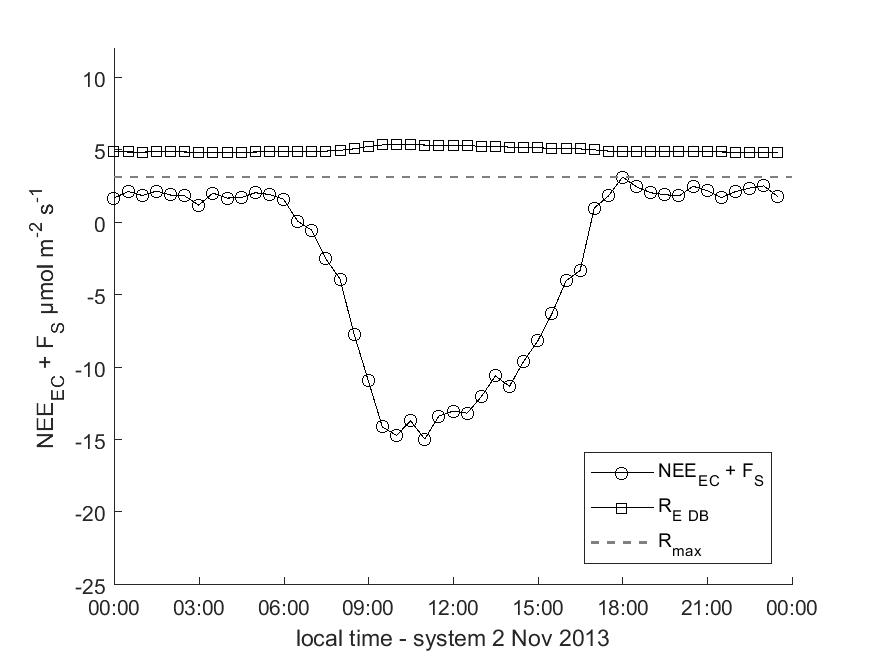

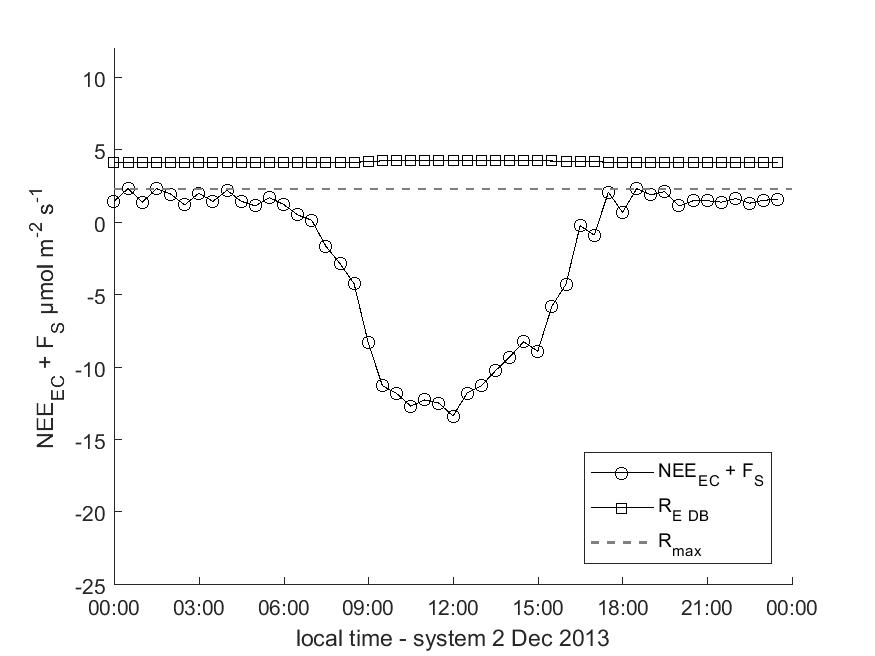

Supplement: f1 [file 9287249.f1.docx]
